# Supplementary material
Source: PubMed Central journal article supplement (PMC4715578)

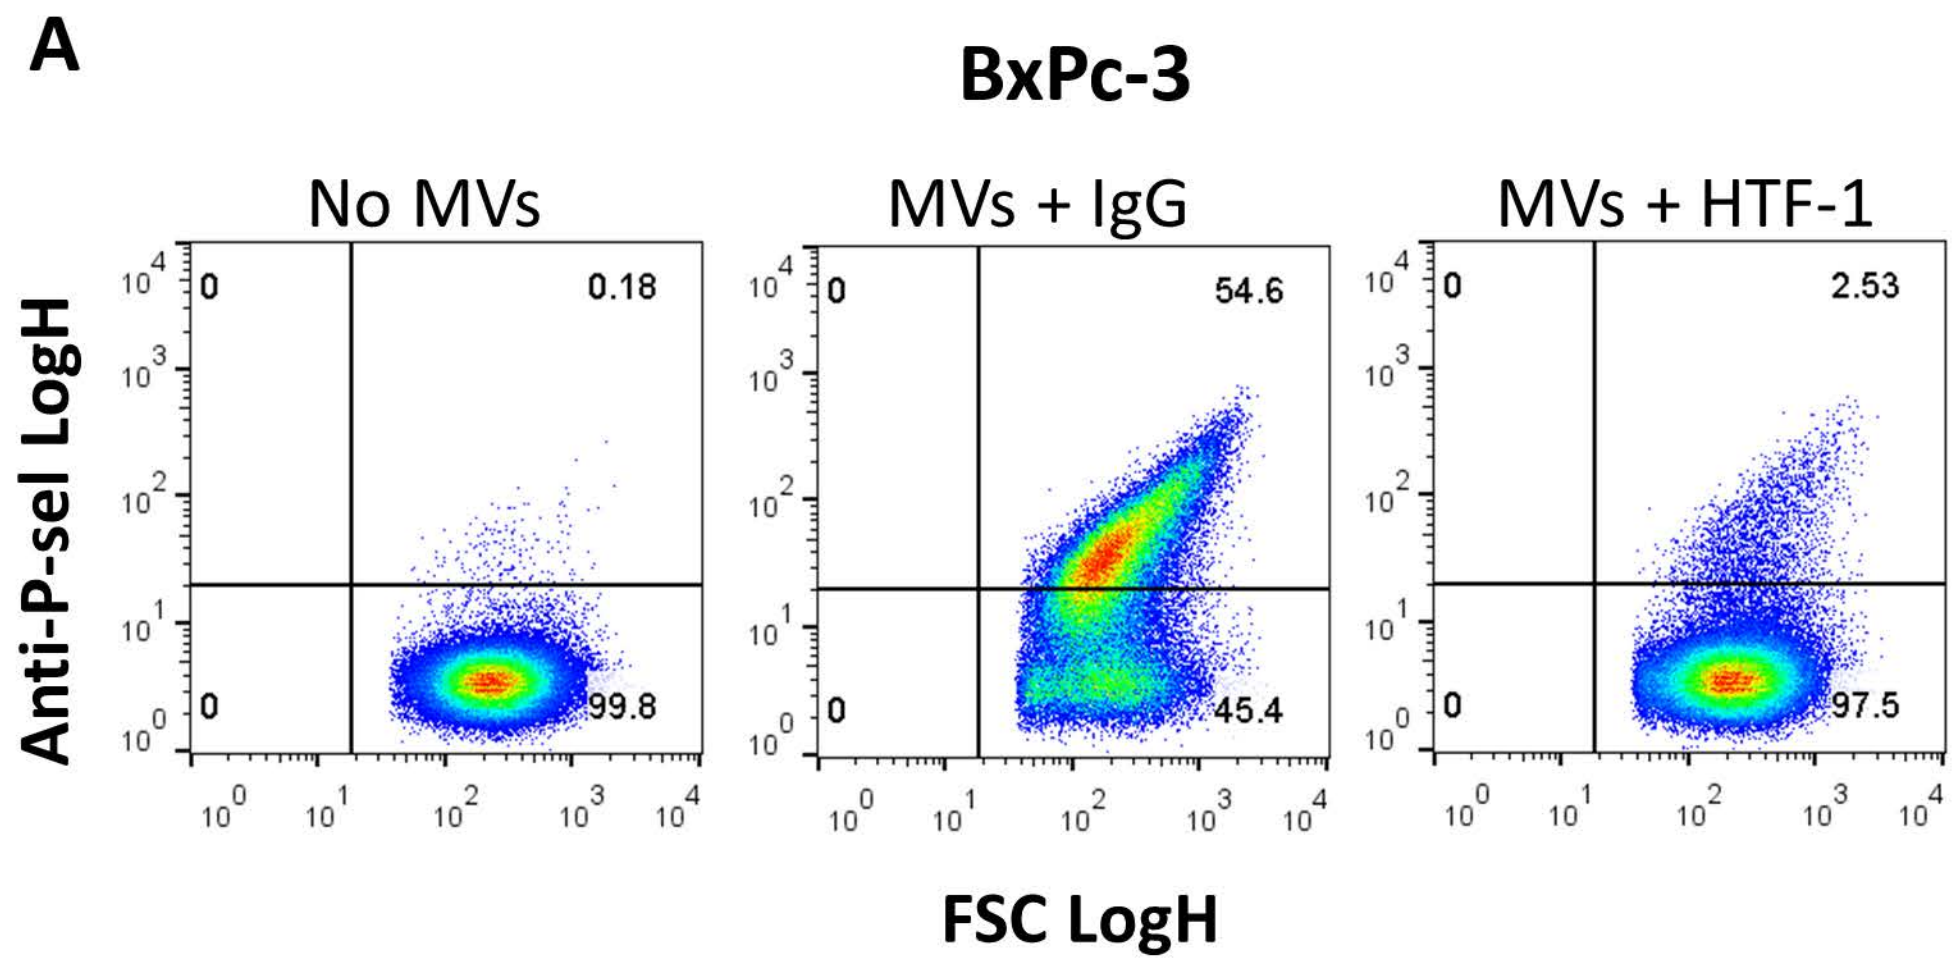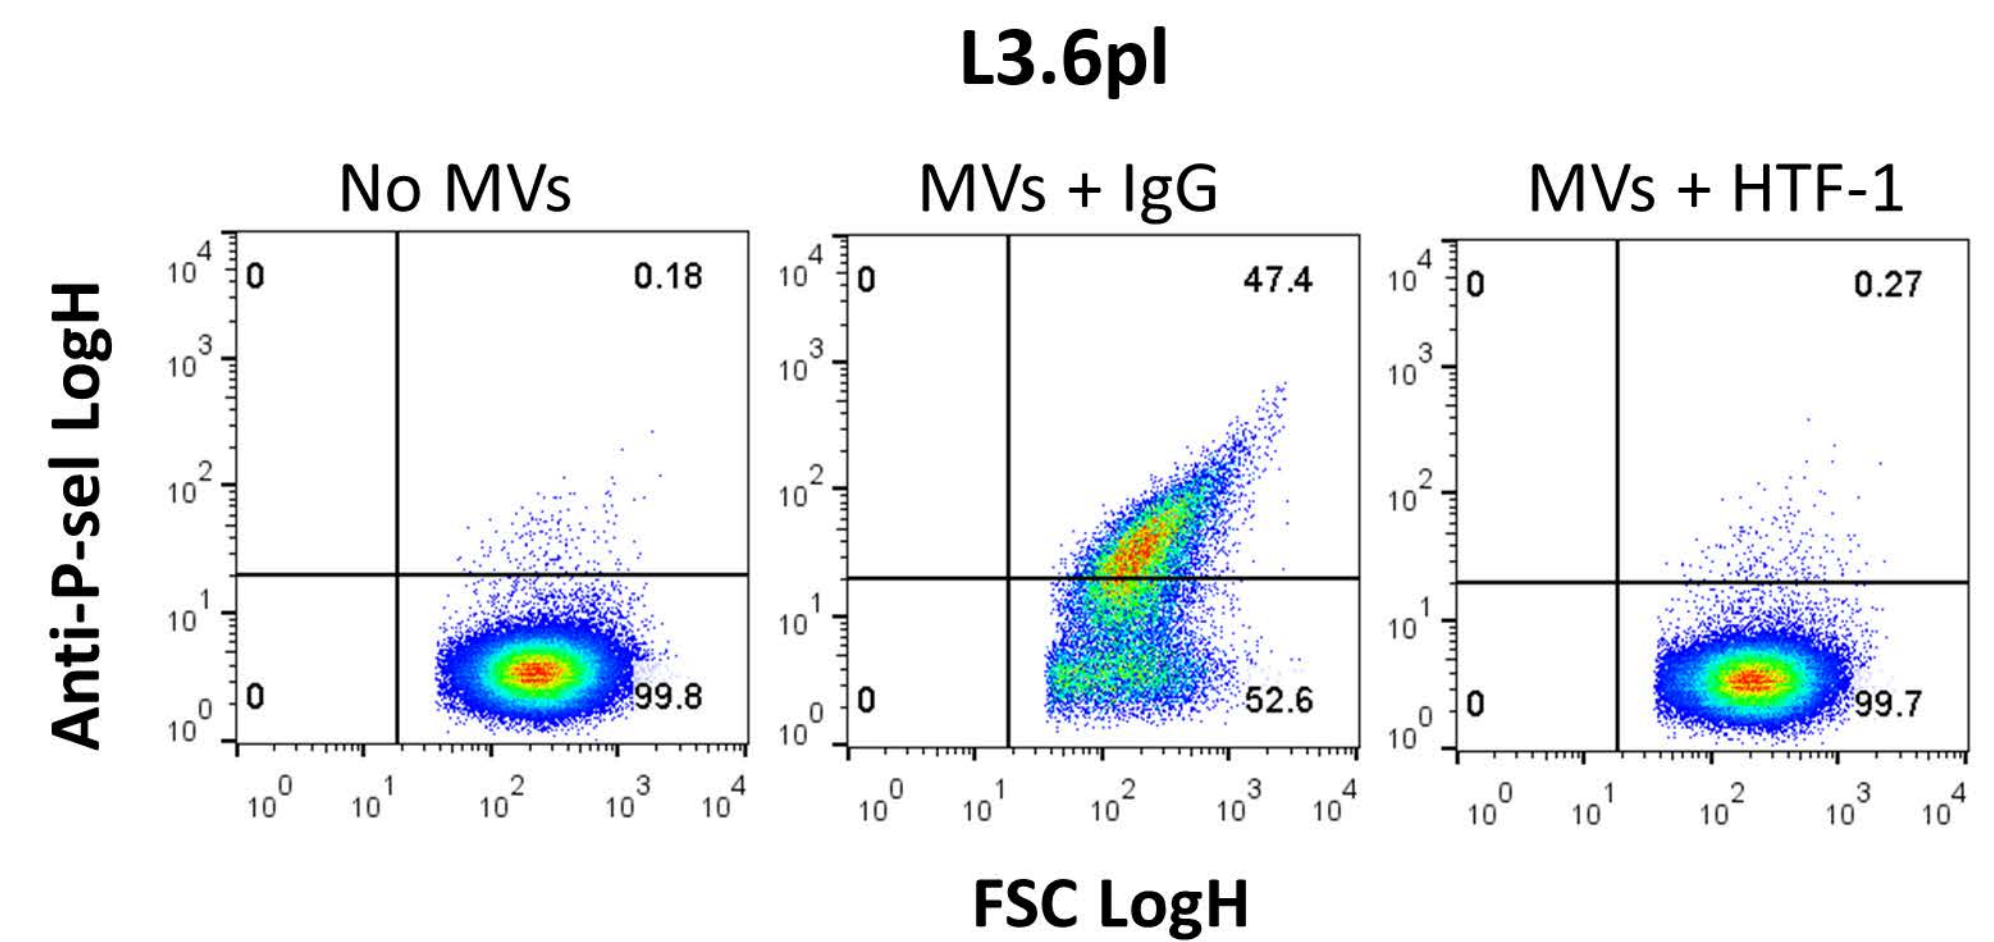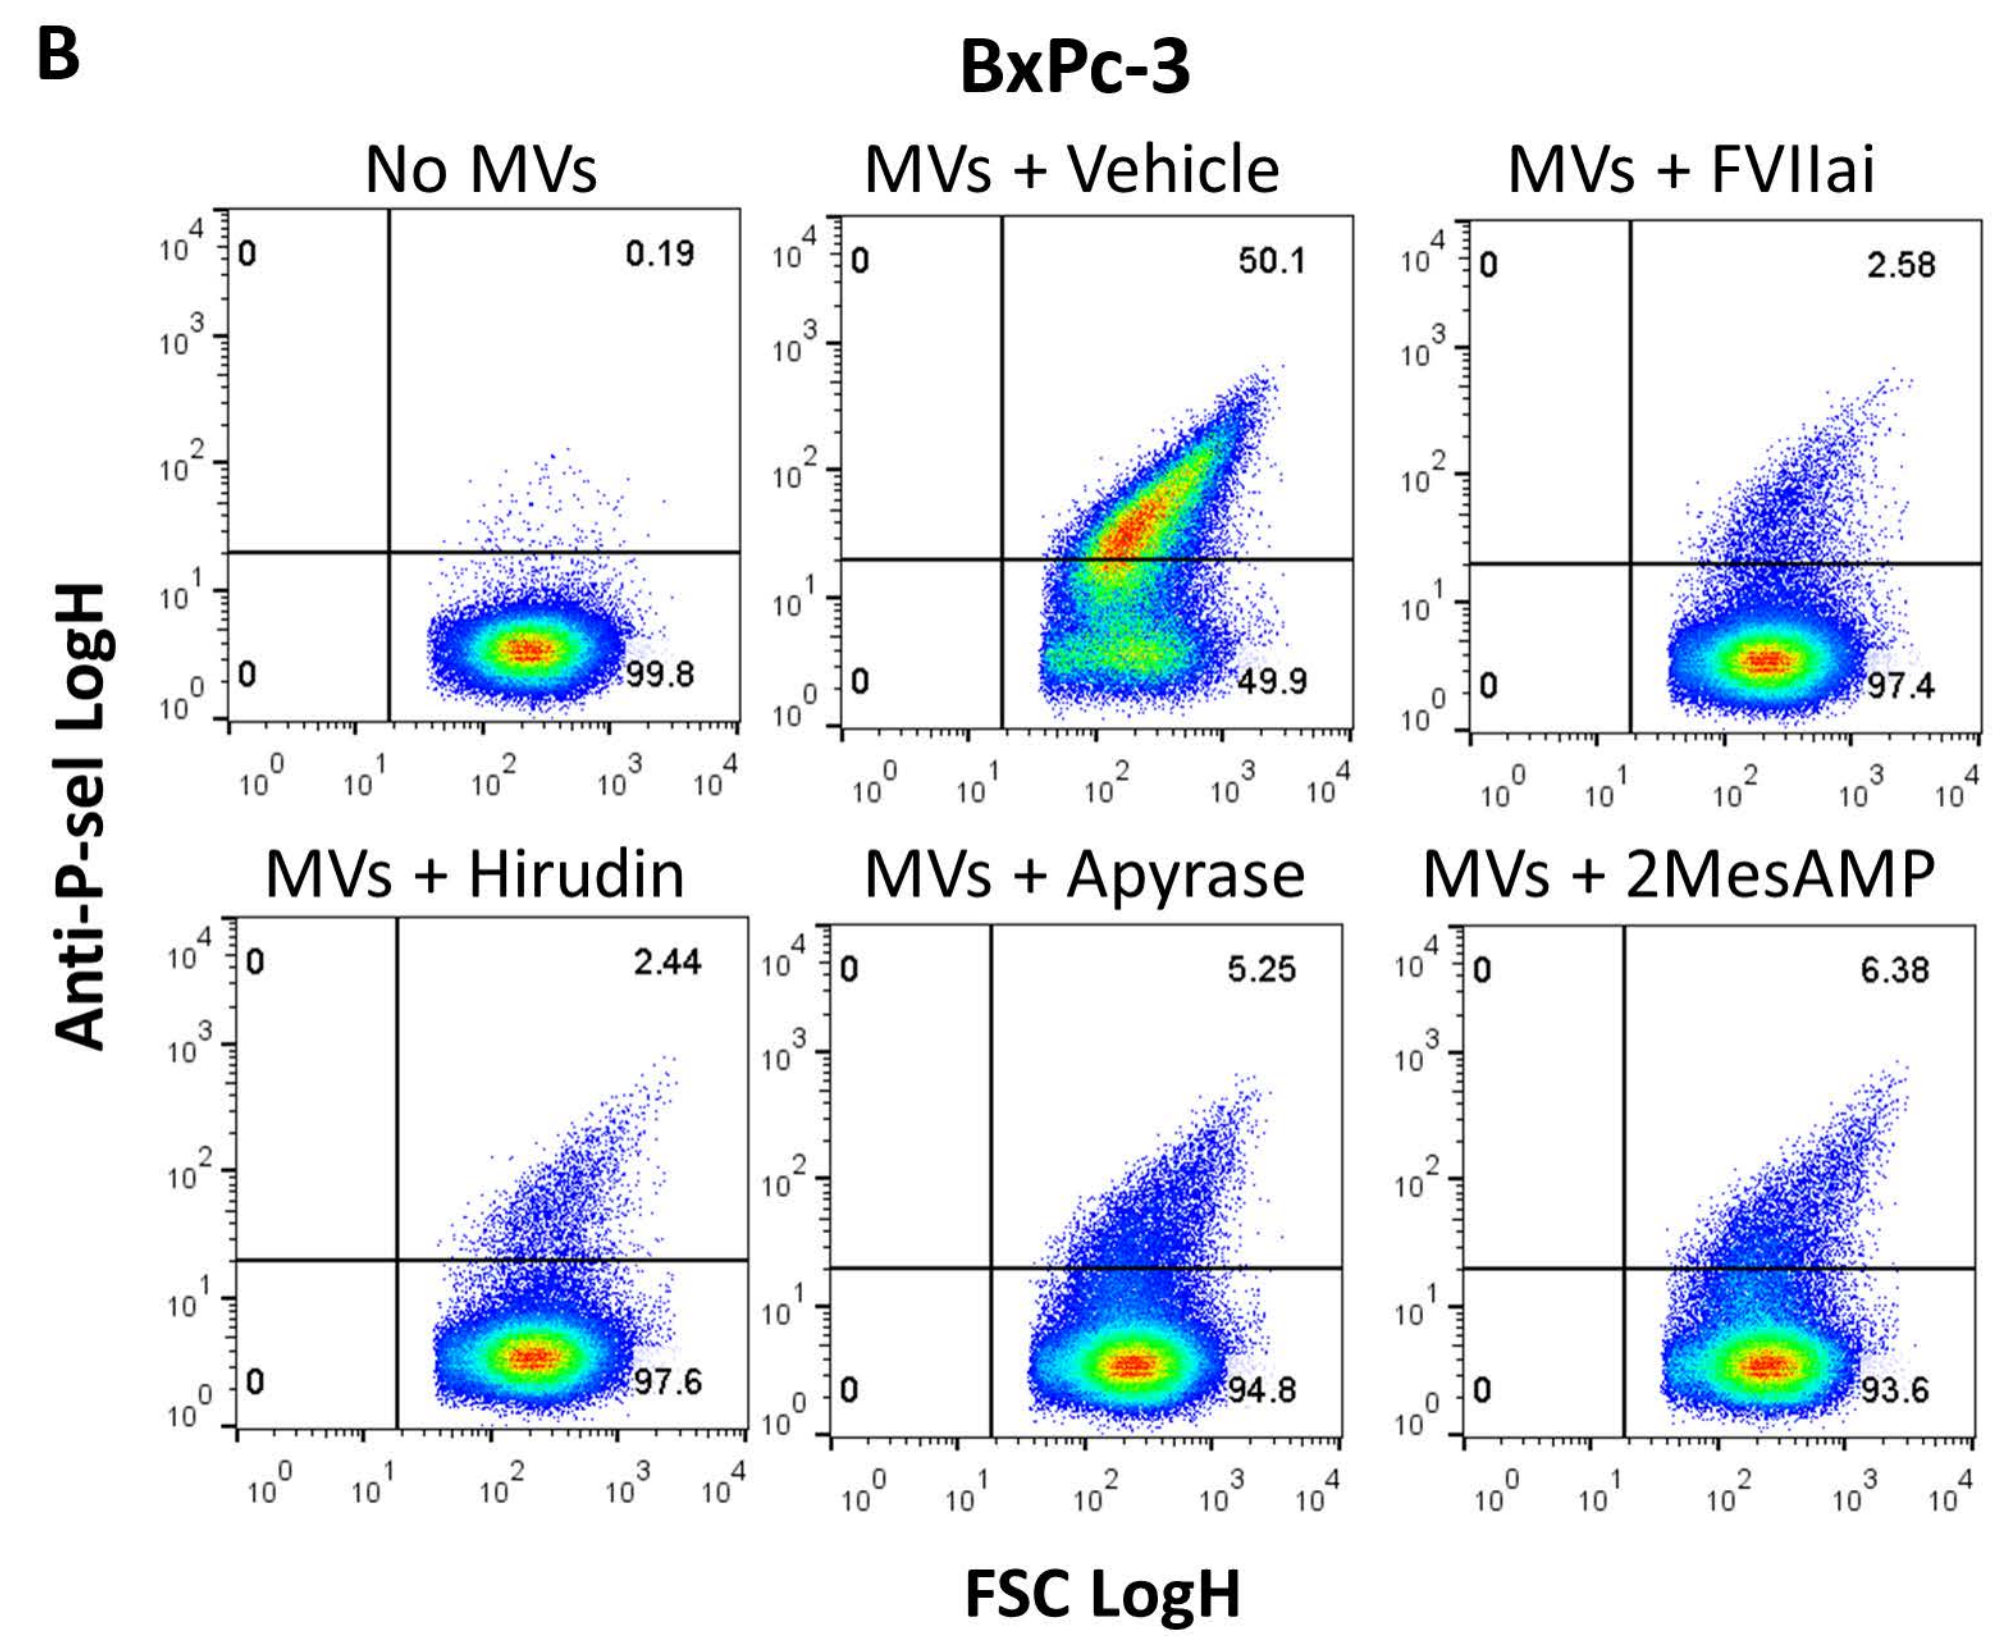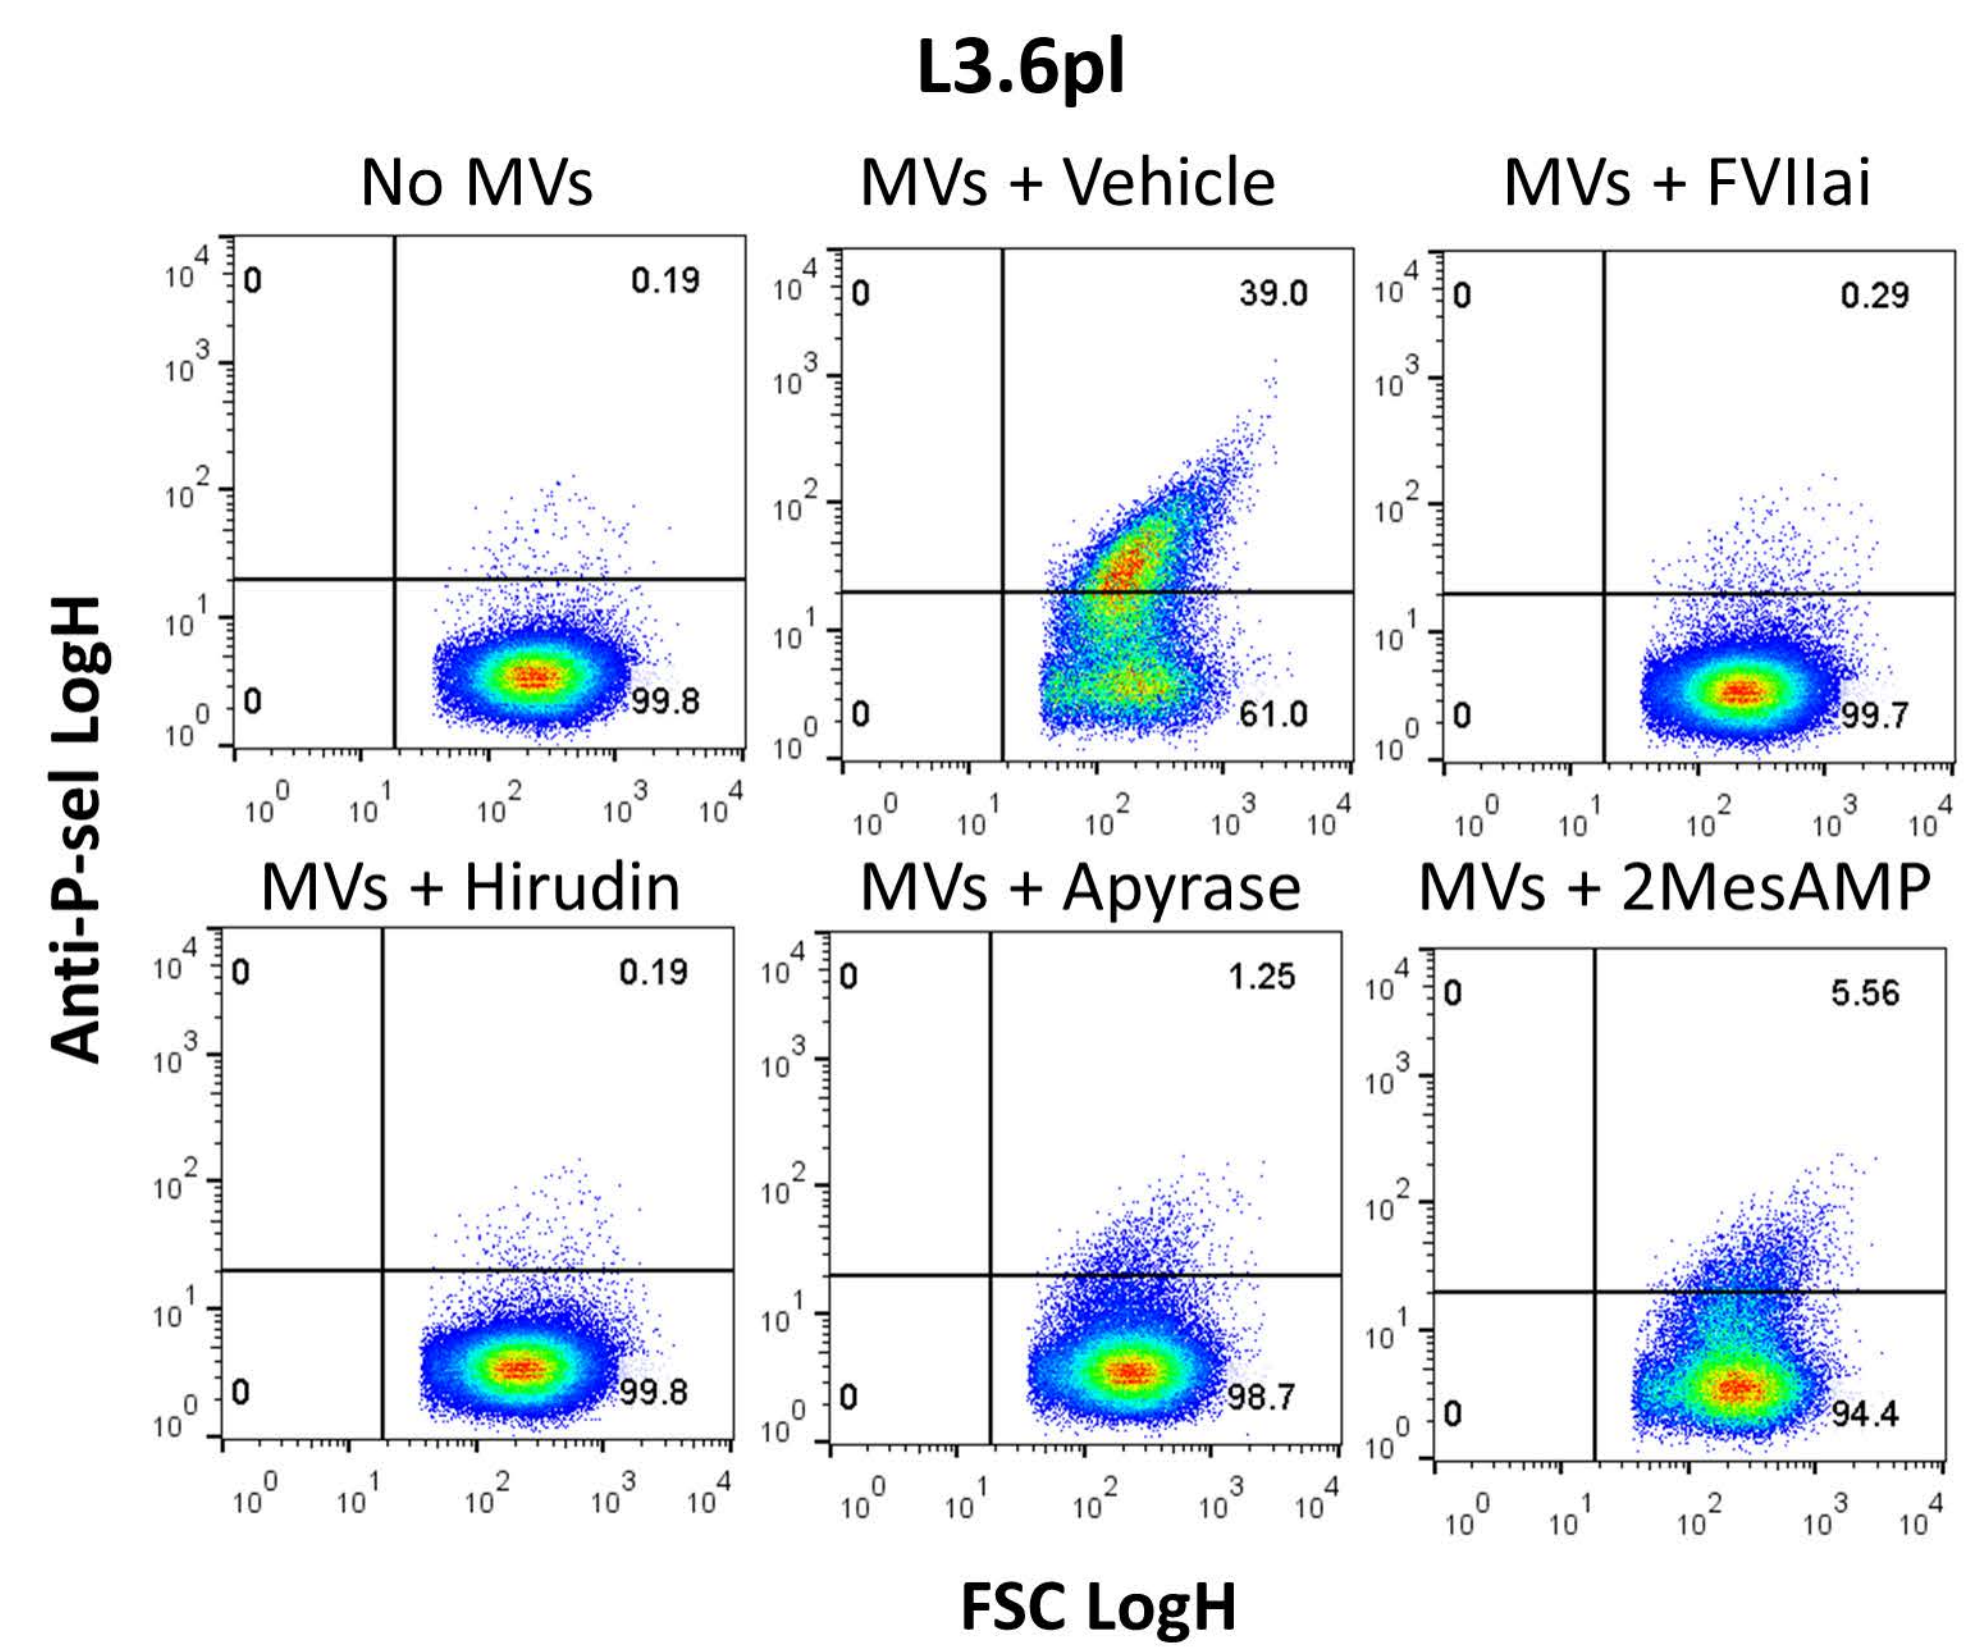



**A**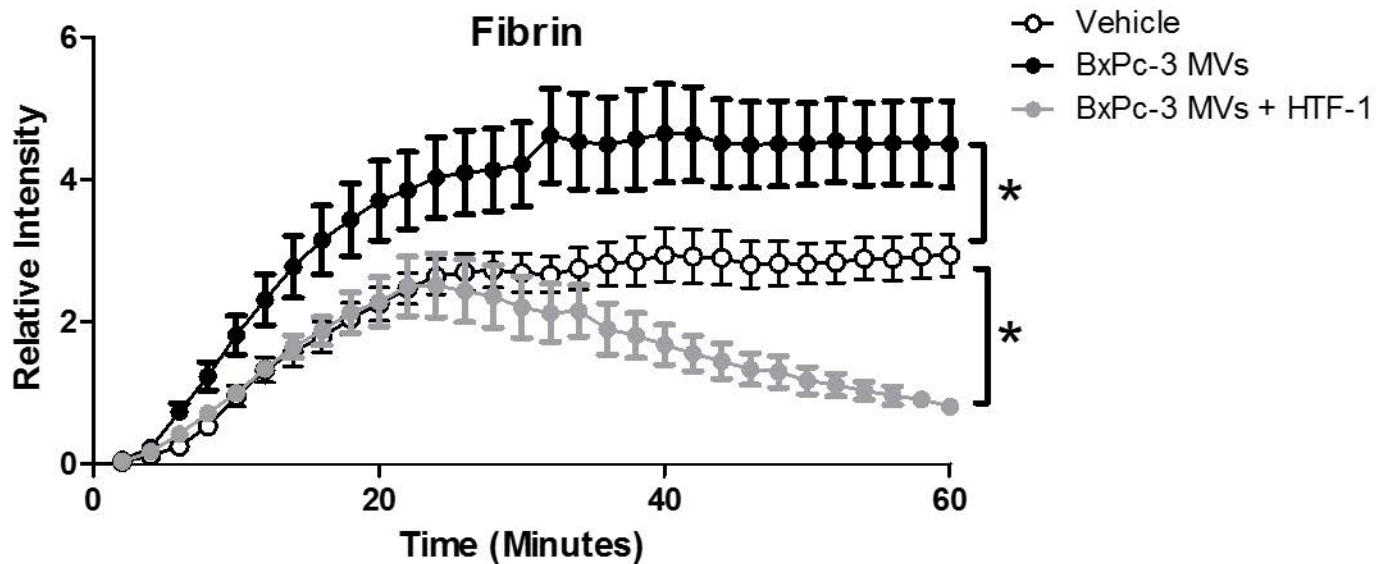**B**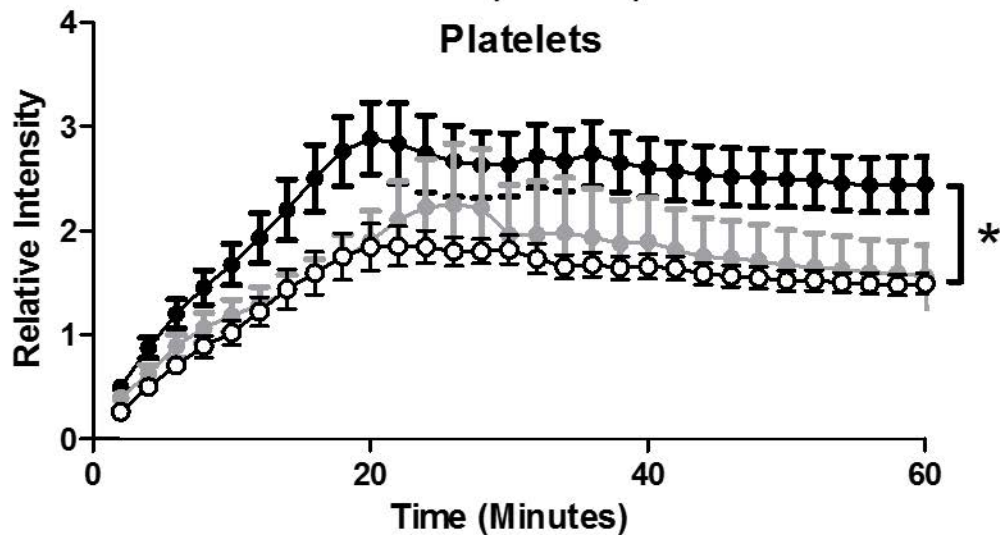

Supplement: NIHMS734865-supplement-Supp_FigureS1-S2.pdf [file NIHMS734865-supplement-Supp_FigureS1-S2.pdf]
